# Supplementary material for: Regulated dual defects of ligand defects and lattice defects in UIO-66 for ultra-trace simultaneous detection and removal of heavy metal ions
Source: Royal Society of Chemistry journal article supplement (doi:10.1039/d4qm00920g), 2024-12-06
Supplement: d4qm00920g1.pdf [file d4qm00920g1.pdf]

1

## Supporting information

2

Regulated Dual Defects of Ligand Defects and Lattice Defects

3

in UIO-66 for Ultra trace Simultaneous Detection and Removal

4

of Heavy Metal Ions

5

*Dahui An<sup>a</sup>, Shan Jin<sup>a</sup>, Junhua Zheng<sup>a</sup>, Mubai Liao<sup>a</sup>, Long Chen<sup>a,\*</sup>*

6

<sup>a</sup>School of Chemistry and Chemical Engineering/State Key Laboratory Incubation Base

7

for Green Processing of Chemical Engineering, Shihezi University, Shihezi, 832003,

8

China

9

E-mail addresses: arnoan@qq.com (D.H. An)

10

\* Corresponding author.

11

E-mail addresses: chenlong2012@sinano.ac.cn (L. Chen)

12

|    |                                                                                                           |   |
|----|-----------------------------------------------------------------------------------------------------------|---|
| 13 | <b>Table of Contents</b>                                                                                  |   |
| 14 | Section S1. Experimental Procedures .....                                                                 | 3 |
| 15 | 1.1 Materials                                                                                             |   |
| 16 | 1.2 Material characterization                                                                             |   |
| 17 | 1.3 Inkjet printing                                                                                       |   |
| 18 | 1.4 HMIs detection                                                                                        |   |
| 19 | 1.5 HMIs adsorption                                                                                       |   |
| 20 | Section S2. Supplementary Characterizations and Electrochemical Results.....                              | 7 |
| 21 | Figure S1. HRTEM and Fast Fourier Transform of D-D-UIO-66                                                 |   |
| 22 | Figure S2. Full XPS spectra of UIO-66, D-UIO-66 and D-D-UIO-66                                            |   |
| 23 | Figure S3. Simultaneous detection of D-UIO-66 for Cd(II), Pb(II) Cu(II) and Hg(II).                       |   |
| 24 | Figure S4. Simultaneous detection of D-D-UIO-66 for Cd(II), Pb(II) Cu(II) and                             |   |
| 25 | Hg(II).                                                                                                   |   |
| 26 | Figure S5. CV curves of D-D-UIO-66 /GCE in the solution containing 5.0 mM                                 |   |
| 27 | [Fe(CN) <sub>6</sub> ] <sup>3-/4-</sup> and 0.1 M KCl and the linear relationship between the anodic peak |   |
| 28 | currents and the square root of scan.                                                                     |   |
| 29 | Figure S6. CV curves of D-UIO-66 /GCE in the solution containing 5.0 mM                                   |   |
| 30 | [Fe(CN) <sub>6</sub> ] <sup>3-/4-</sup> and 0.1 M KCl and the linear relationship between the anodic peak |   |
| 31 | currents and the square root of scan.                                                                     |   |
| 32 | Figure S7. The reproducibility of D-D-UIO-66                                                              |   |
| 33 | Figure S8. The stability of D-D-UIO-66                                                                    |   |
| 34 | Figure S9. DPASV curves in Shuxiang Lake in Shihezi, China for the Cd(II), Pb(II)                         |   |

35 Cu(II) and Hg(II).

36 Figure S10. DPASV curves in Yangtze River Main Stream (Anhui Section) in  
37 Tongling, China for the Cd(II), Pb(II) Cu(II) and Hg(II)

38 Figure S11. The comparison of Cd(II), Pb(II) Cu(II) and Hg(II) sensitivity in different  
39 types of water

40 Figure S12. O 1s XPS Spectra of D-D-UIO-66 before and after adsorption.

41 Figure S13 FT-IR spectra of UiO-66 ,D-UiO-66 and D-D-UIO-66.

42 Table S1 Compared with other materials Pb(II) detection performance

43 Table S2 Comparison of individual and simultaneous detection

44 Table S3. Langmuir and Freundlich adsorption parameters for Pb(II) on the four  
45 adsorbents at 298 K.

46 Table S4. Estimates of parameter values for the adsorption of Pb(II) on adsorbents at  
47 298 K according to the pseudo-first-order and pseudo-second-order models.

48 Table S5 Comparison of LOD and theoretical adsorption capacity for Pb(II) with other  
49 bifunctional materials.

50 Table S6 Comparison of theoretical adsorption capacity for Pb(II) with other  
51 monofunctional materials.

|    |         |       |            |
|----|---------|-------|------------|
| 52 | Section | S3.   | References |
| 53 | .....   | ..... | 23         |

## 54 **1. Experimental**

### 55 **1.1 Materials**

56 All chemicals were analytically pure and were used as purchased, without any  
57 further purifications. Zirconyl Chloride Octahydrate, 98% was purchased from  
58 Shanghai Adamas Reagent Co., Ltd. Absolute ethanol, Cerium nitrate hexahydrate  
59 99.5%, Trifluoroacetic acid AR, p-Phthalic acid 99% were purchased from Shanghai  
60 Macklin Biochemical Technology Co., Ltd. Deionized water was used throughout the  
61 electrochemical measurements and materials preparation.

### 62 **1.2 Material characterization**

63 The synthesized D-D-UIO-66 materials were characterized by the powder X-ray  
64 diffraction (XRD; Rigaku XRD-6100, Japan); scanning electron microscopy (SEM,  
65 Hitachi SU8010, Japan) with energy dispersive X-ray spectroscopy (EDX) and  
66 transmission electron microscopy (TEM; FEI Talos F200X G2, USA); X-ray  
67 photoelectron spectroscopy (XPS; Thermo Scientific K-Alpha, USA) was conducted  
68 using monochromatic Al K $\alpha$  X-ray source; The specific surface areas were obtained  
69 from N<sub>2</sub> adsorption desorption isotherms at 77 K with BET surface area analyzer (BET;  
70 Micromeritics, ASAP 2460, GA, USA); Thermogravimetric analysis (TG)  
71 measurements were made with a DSC/DTA-TG unit (Rigaku TG/DTA8122, Japan)  
72 under N<sub>2</sub> atmosphere from 30 °C to 800 °C at heating rate of 10 °C min<sup>-1</sup>; The  
73 concentration of HMIs was determined by a Contra 700 (Analytik Jena, Germany)  
74 Inductively Coupled Plasma-Atomic Emission Spectrometry (ICP-AES).

### 75 **1.3 Inkjet printing**

76 The ink was filtrated through a filter with a pore size of 0.45  $\mu\text{m}$  before printing.  
77 Picolitre drops of the ink were ejected from a dope-on-demand inkjet system RD-  
78 PMF100 (MicroFab Technologies) onto the glassy carbon electrode (GCE). Printing  
79 was performed at a voltage pulse of 27 V with a droplet velocity of 1.24  $\text{m s}^{-1}$

#### 80 **1.4 HMIs detection**

81 All electrochemical experiments were performed on an electrochemical  
82 workstation (CHI 760E, CH Instruments Inc., Shanghai, China) with a conventional  
83 three-electrode system, where the bare or D-D-UIO-66/GCE modified electrode,  
84 Ag/AgCl and platinum wire electrode served as the working, reference, and auxiliary  
85 electrodes, respectively. The differential pulse anodic stripping voltammetry (DPASV)  
86 measurement was utilized for the observation of electrochemical detection behavior  
87 toward Pb(II), Cd(II), Cu(II), and Hg(II) under optimized experimental conditions. The  
88 actual water is first filtered to remove insoluble impurities, then diluted with a 0.1 M  
89 HAc–NaAc buffer solution to form a real water sample with a volume ratio of 1:9.

#### 90 **1.5 HMIs adsorption**

91 **Adsorption isotherms.** During an isotherm adsorption experiments, 20 mg adsorbents were  
92 dispersed in 20 mL Pb(II) aqueous solution with initial concentrations ranged from 100 to 1000 mg  
93  $\text{L}^{-1}$ . The adsorption process performed in a shaker at 200 rpm for 700 minutes at 25  $^{\circ}\text{C}$ . The  
94 adsorption capacity of Pb(II) on four adsorbents was calculated using Eq. (1):

$$95 \quad Q_e = \frac{V(C_0 - C_e)}{m} \quad (1)$$

96 Where  $Q_e$  is the equilibrium adsorption capacity ( $\text{mg L}^{-1}$ ),  $C_0$  and  $C_e$  are the initial and  
97 equilibrium concentration of Pb(II) ( $\text{mg L}^{-1}$ ), respectively,  $m$  is the mass of adsorbents (g),  $V$  is the

98 volume of Pb(II) solution (L). The isotherm adsorption dates were analyzed using Langmuir Eq. (2)

99 and the Freundlich Eq. (3) isotherm model at 25 °C

100 
$$Q_e = \frac{K_L Q_m C_e}{1 + K_L C_e} \quad (2)$$

101 
$$Q_e = K_F C_e^{1/n} \quad (3)$$

102 Where  $C_e$  (mg g<sup>-1</sup>) is the equilibrium concentration of the Pb(II) solution,  $Q_e$  (mg g<sup>-1</sup>) is the  
103 equilibrium adsorption capacity of the adsorbent,  $Q_m$  (mg g<sup>-1</sup>) is the theoretical maximum adsorption  
104 capacity,  $K_L$  (L mg<sup>-1</sup>) represents Langmuir constant,  $K_F$  (mg<sup>-1/n</sup>L<sup>-1/n</sup> g<sup>-1</sup>) and  $n$  represents Freundlich  
105 constant.

106 **Adsorption kinetics.** Adsorption kinetics was conducted by adding 100 mg of the four  
107 adsorbents into a 100 mL Pb(II) solution with initial concentrations 1000 mg L<sup>-1</sup> at 25 °C. The  
108 kinetic dates were examined by the pseudo-first-order Eq. (4) and pseudo-second-order model Eq.  
109 (5):

110 
$$\ln(Q_e - Q_t) = \ln Q_m - k_1 t \quad (4)$$

111 
$$\frac{t}{Q_t} = \frac{1}{k_2 Q_m^2} + \frac{t}{Q_m} \quad (5)$$

112 Where  $Q_t$  is the adsorption capacity of the adsorbent at time  $t$  and  $Q_m$  (mg g<sup>-1</sup>) and at  
113 equilibrium, respectively,  $k_1$  (min<sup>-1</sup>) and  $k_2$  (g mg<sup>-1</sup> min<sup>-1</sup>) are the corresponding rate constants.

114

115

116

117 **2. Results and discussion**

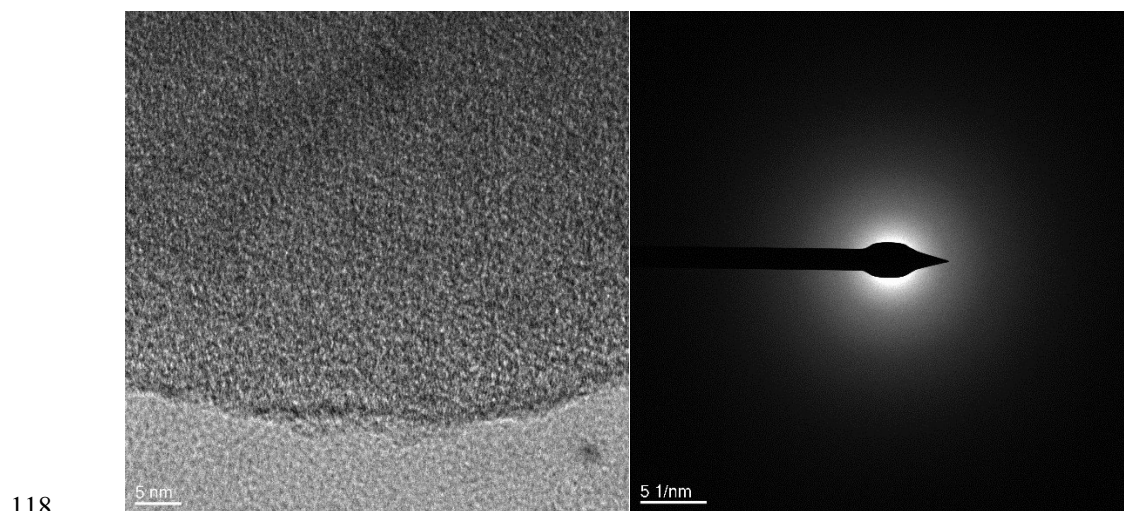

Figure S1 HRTEM and Fast Fourier Transform of D-D-UIO-66

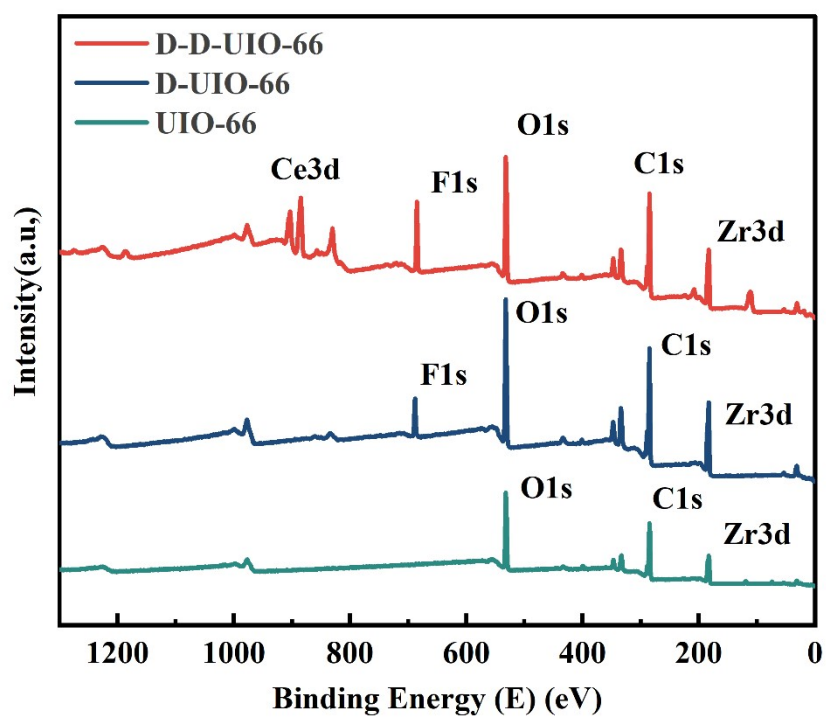

Figure S2 Full XPS spectra of UIO-66, D-UIO-66 and D-D-UIO-66

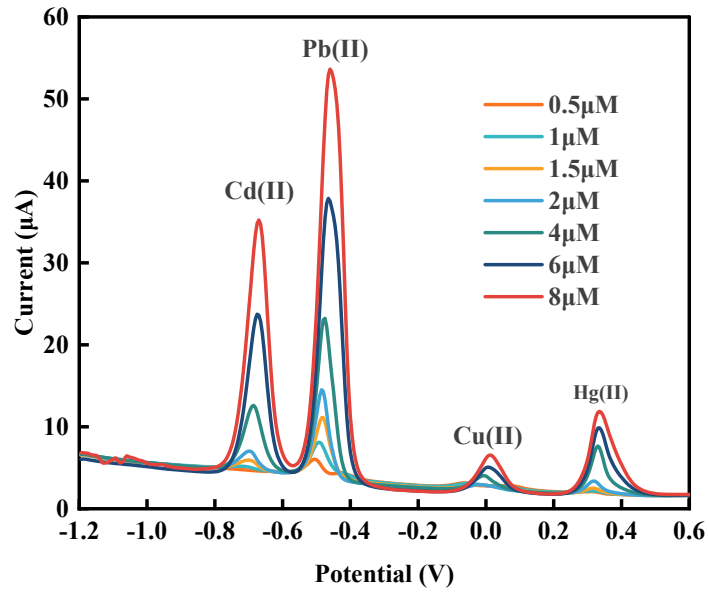

122

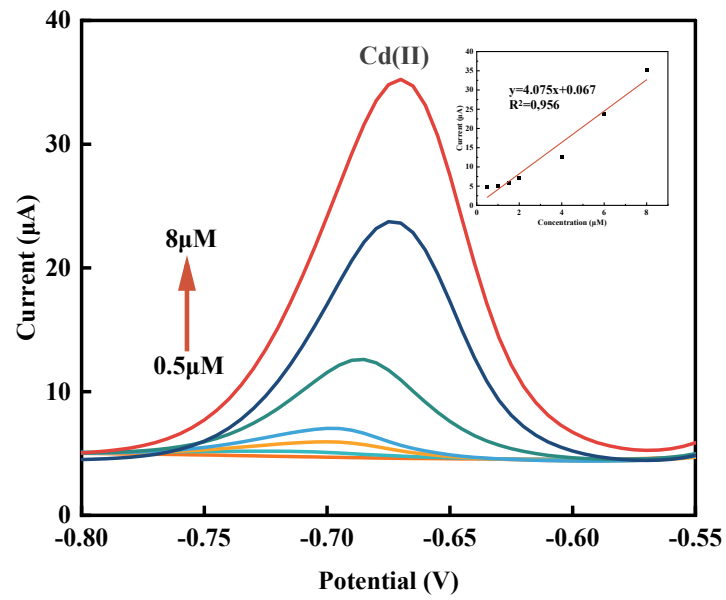

123

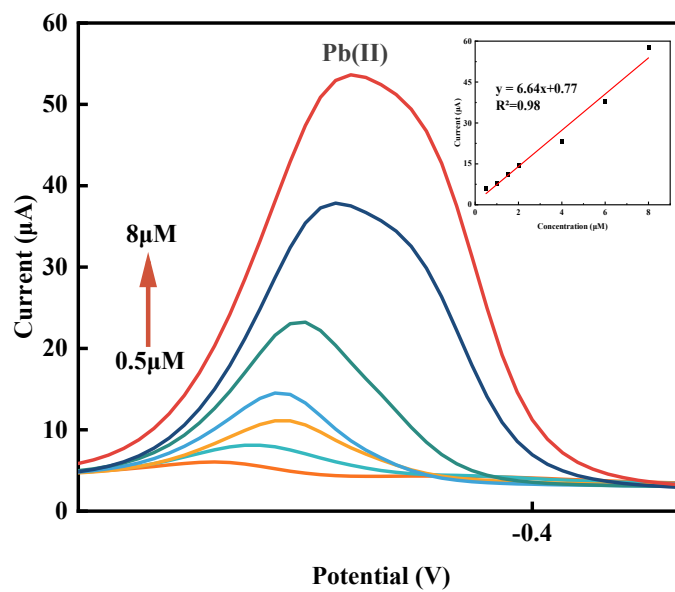

124



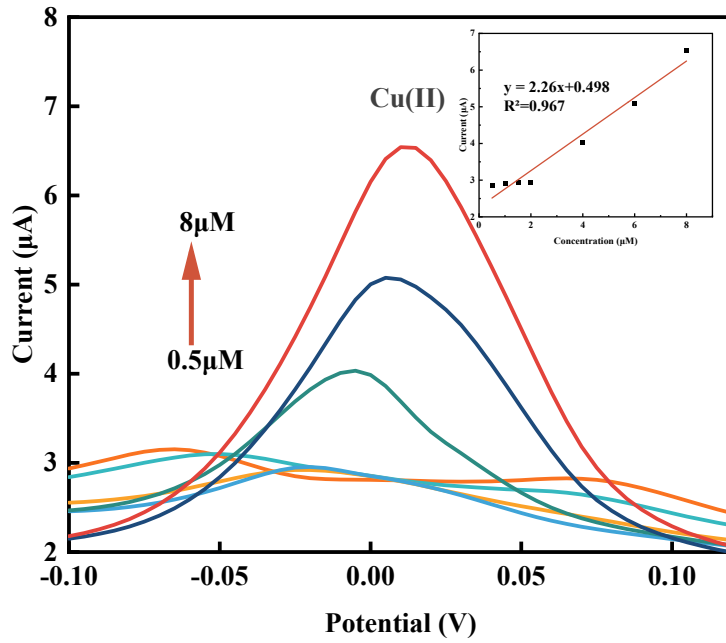

125

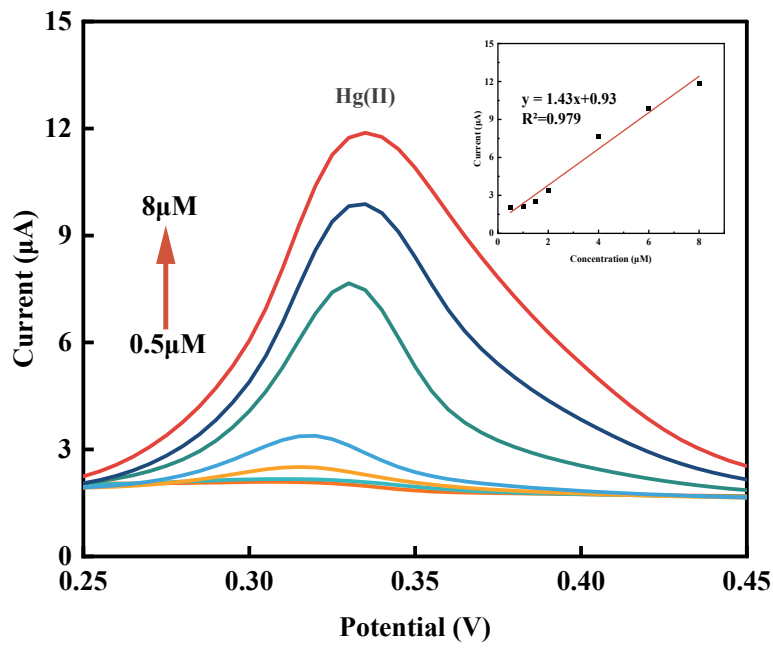

126

127 Figure S3 Simultaneous detection of D-UIO-66 for Cd(II), Pb(II) Cu(II) and Hg(II).

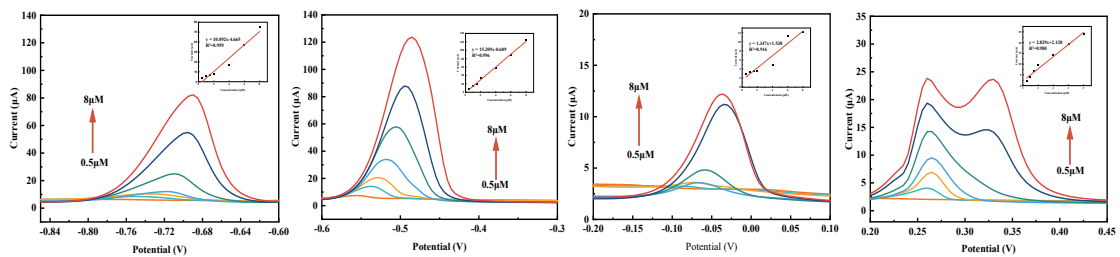

128

129 Figure S4 Simultaneous detection of D-D-UIO-66 for Cd(II), Pb(II) Cu(II) and Hg(II).

130

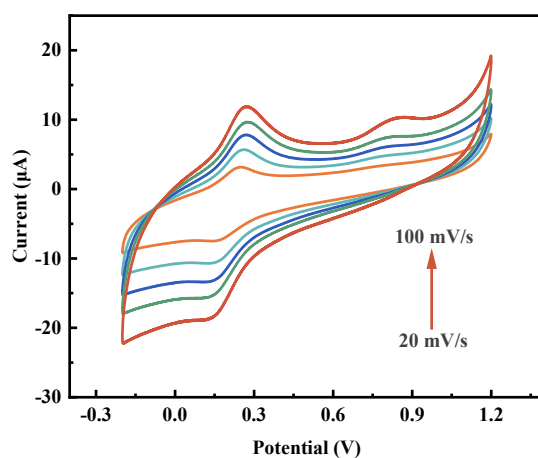

131

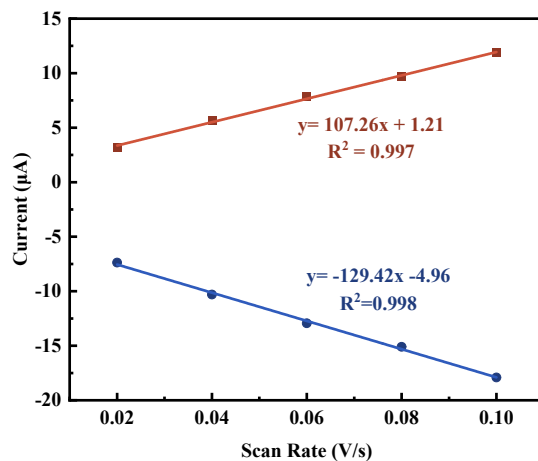

132

133 Figure S5 CV curves of D-D-UIO-66 /GCE in the solution containing 5.0 mM

134  $[\text{Fe}(\text{CN})_6]^{3-/4-}$  and 0.1 M KCl and the linear relationship between the anodic peak

135 currents and the square root of scan.

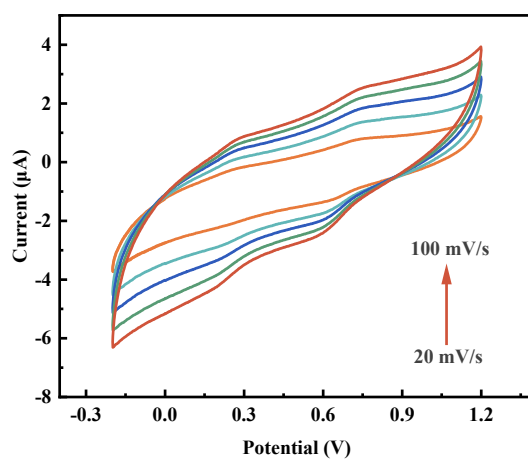

136

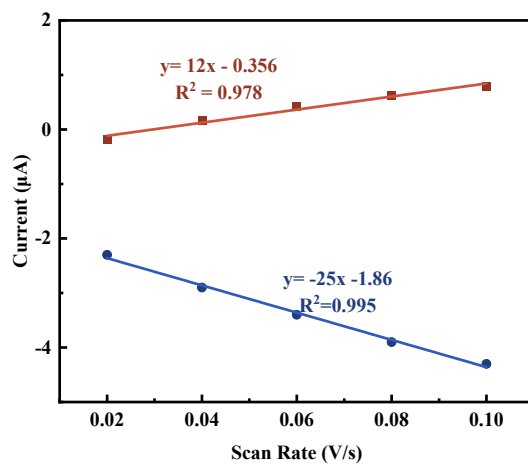

137

138 Figure S6 CV curves of D-UIO-66 /GCE in the solution containing 5.0 mM  
 139  $[\text{Fe}(\text{CN})_6]^{3-/4-}$  and 0.1 M KCl and the linear relationship between the anodic peak  
 140 currents and the square root of scan.

141

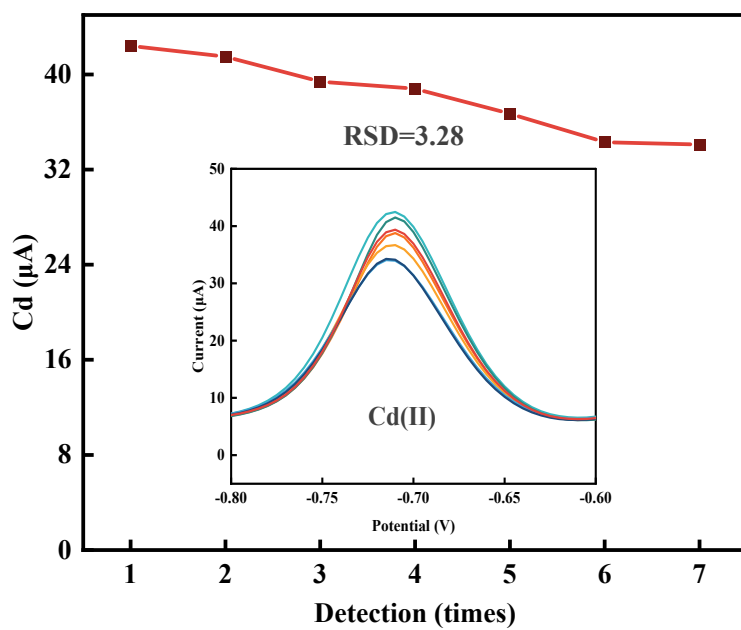

142

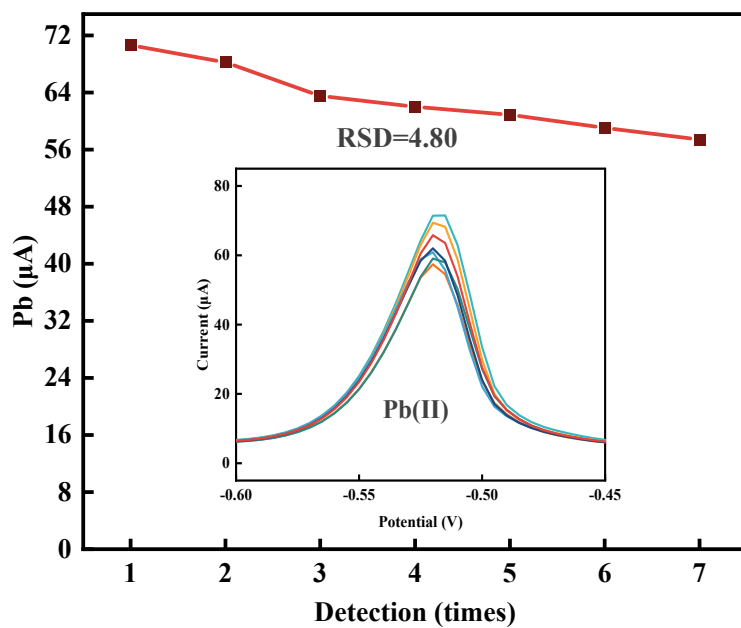

143

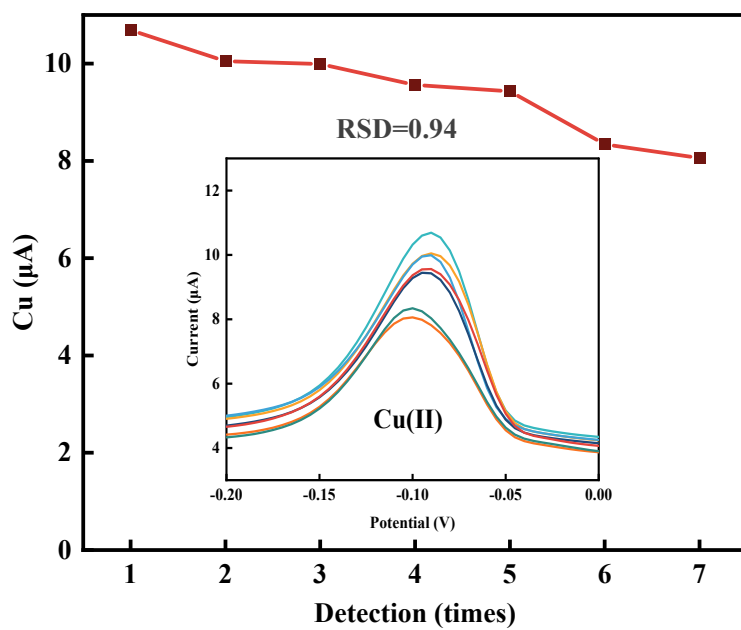

144

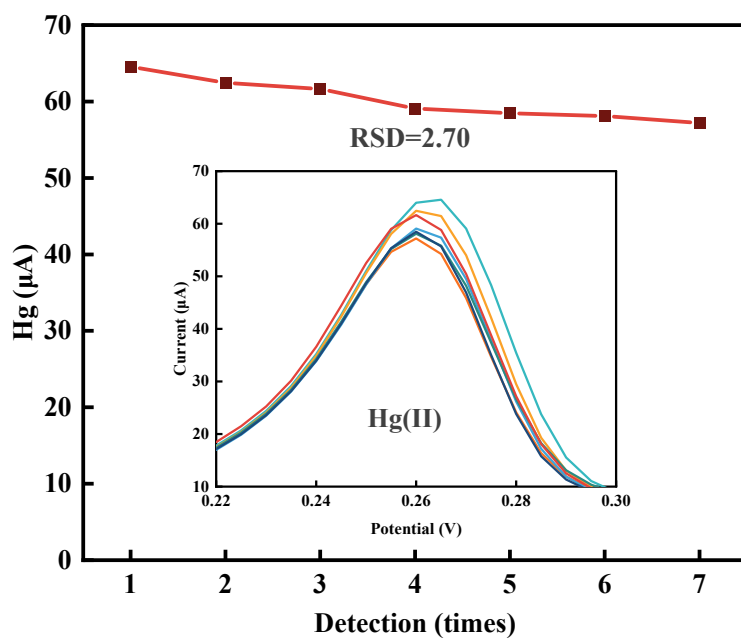

145

146

Figure S7 The reproducibility of D-D-UIO-66.

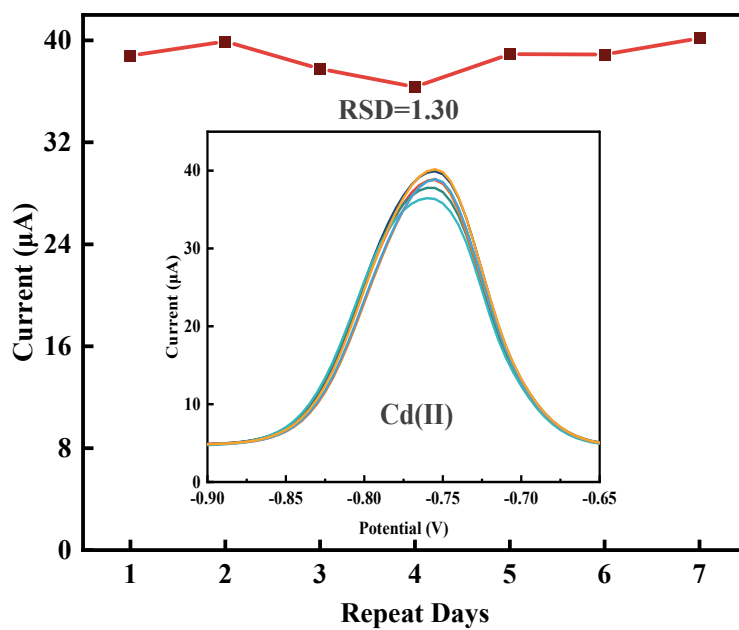

147

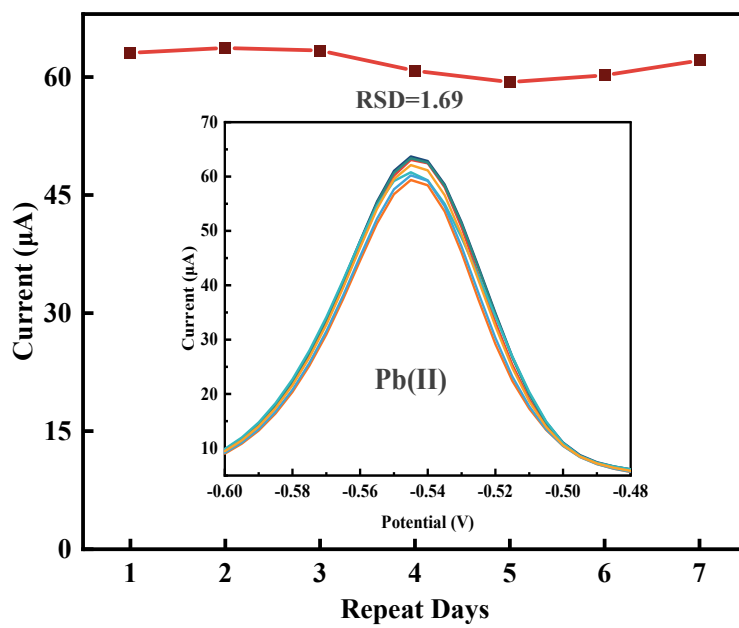

148

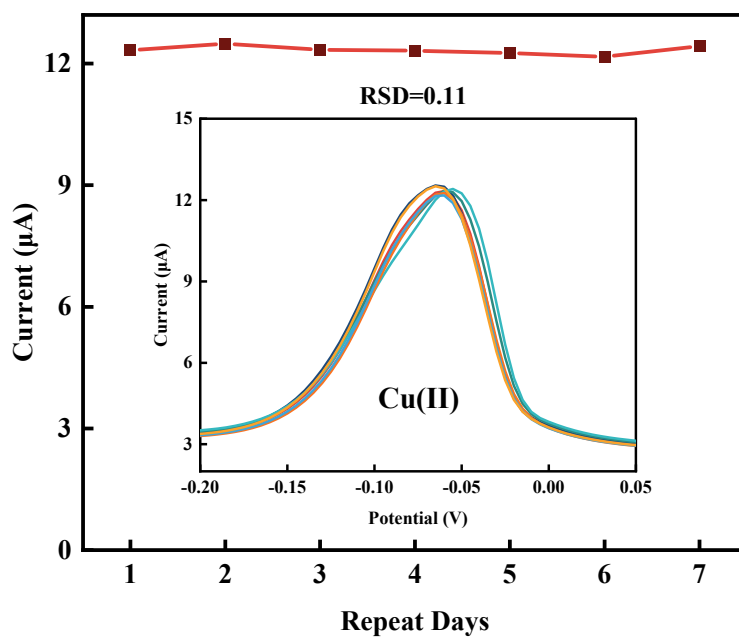

149

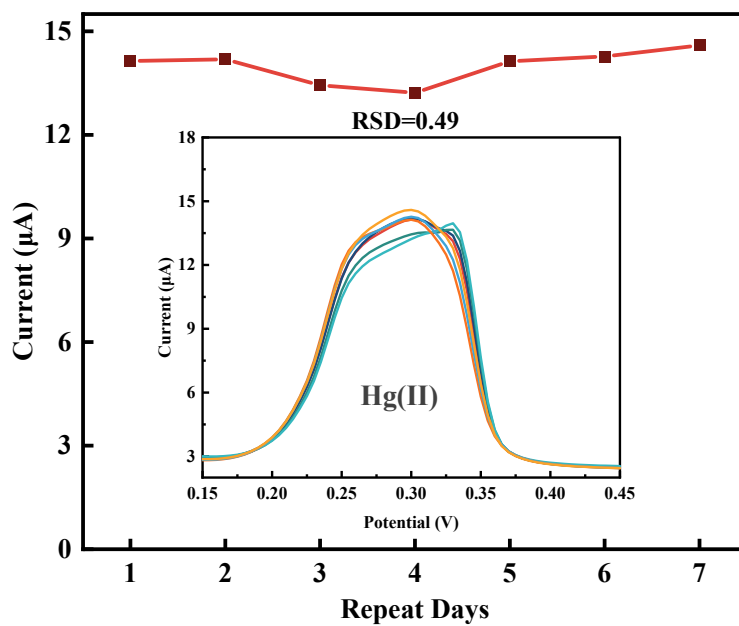

150

151

Figure S8 The stability of D-D-UIO-66.

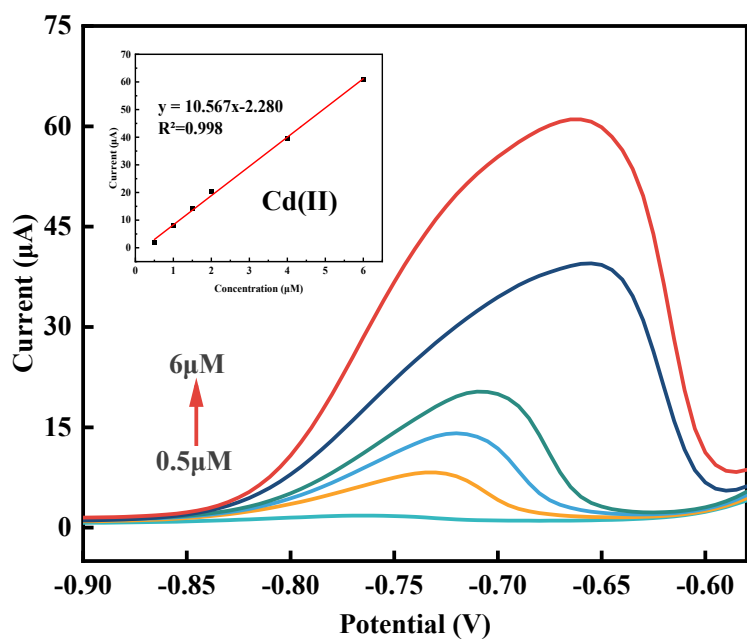

152

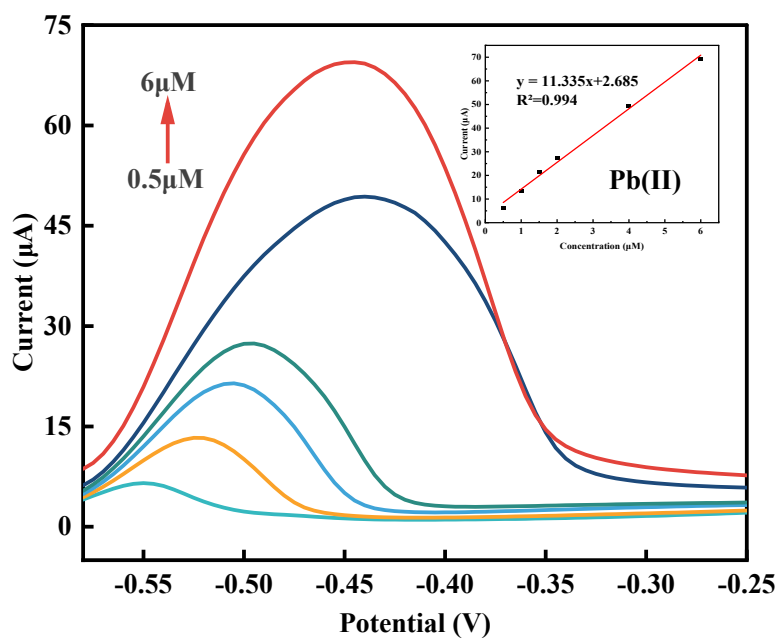

153



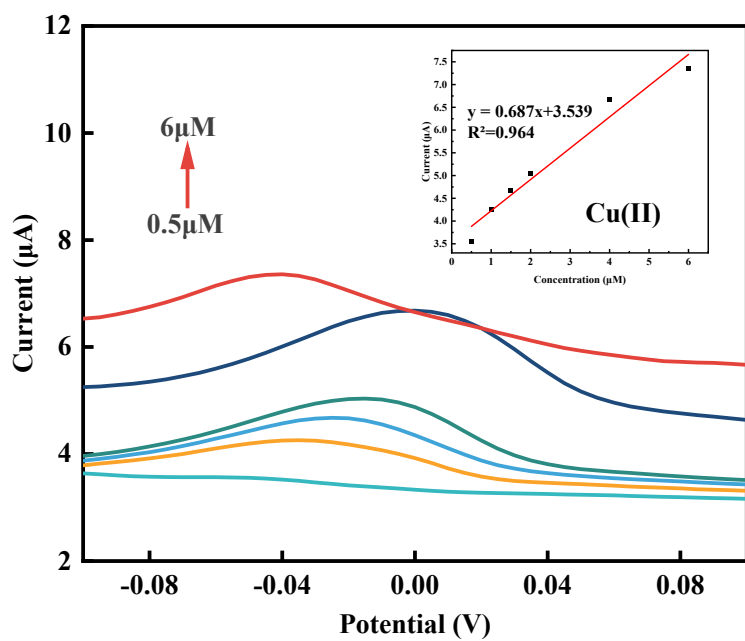

154

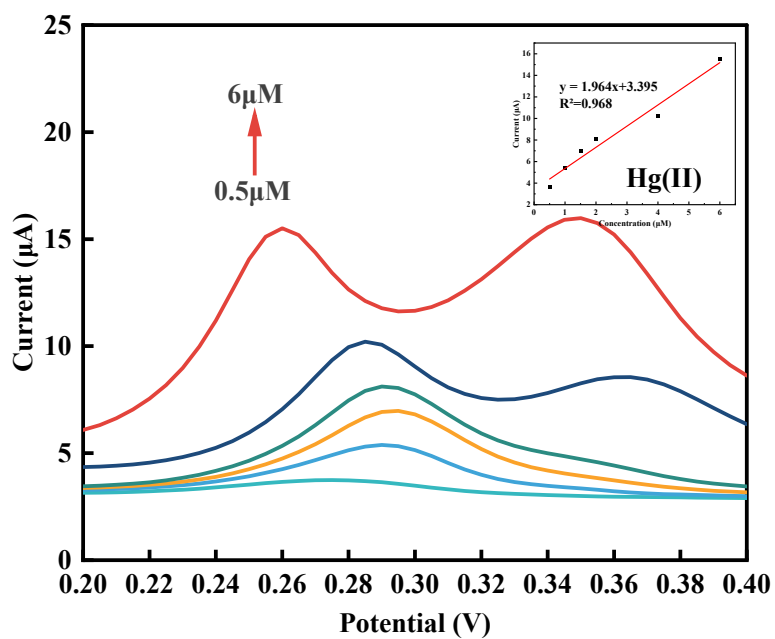

155

156

157

Figure S9 the DPASV curves in Shuxiang Lake in Shihezi, China for the Cd(II), Pb(II) Cu(II) and Hg(II).

158

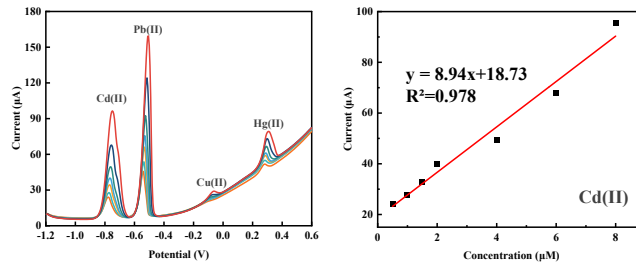

159

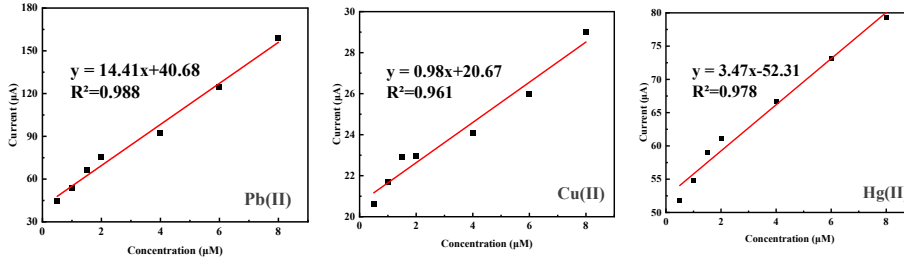

160

Figure S10 DPASV curves in Yangtze River Main Stream (Anhui Section)

161

(Tongling, China) for the Cd(II), Pb(II) Cu(II) and Hg(II)

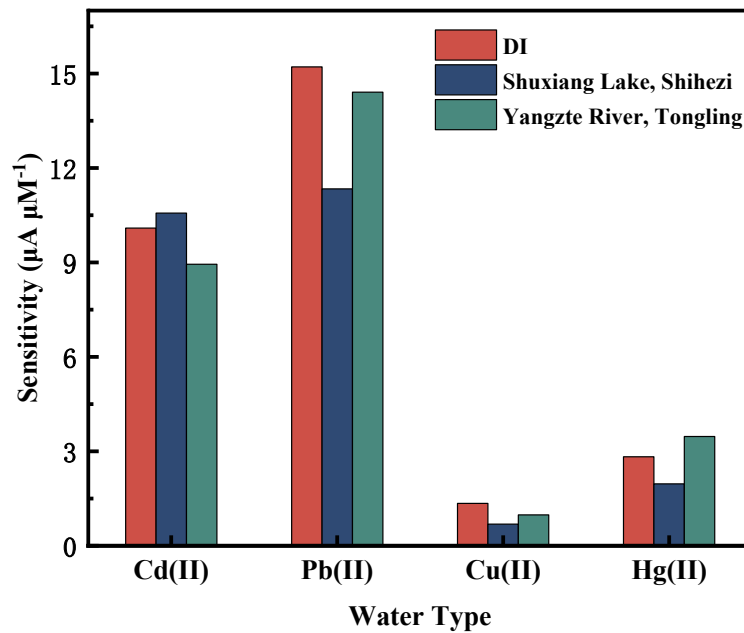

162

163

Figure S11 The comparison of Cd(II), Pb(II) Cu(II) and Hg(II) sensitivity in

164

different types of water

165

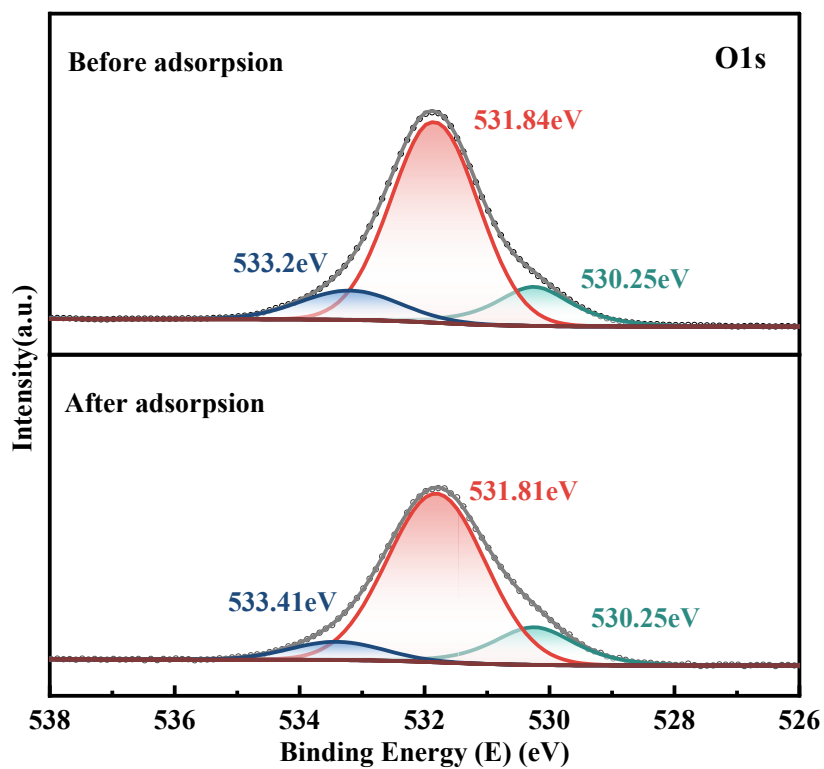

166

167

Figure S12 O 1s XPS Spectra of D-D-UIO-66 before and after adsorption.

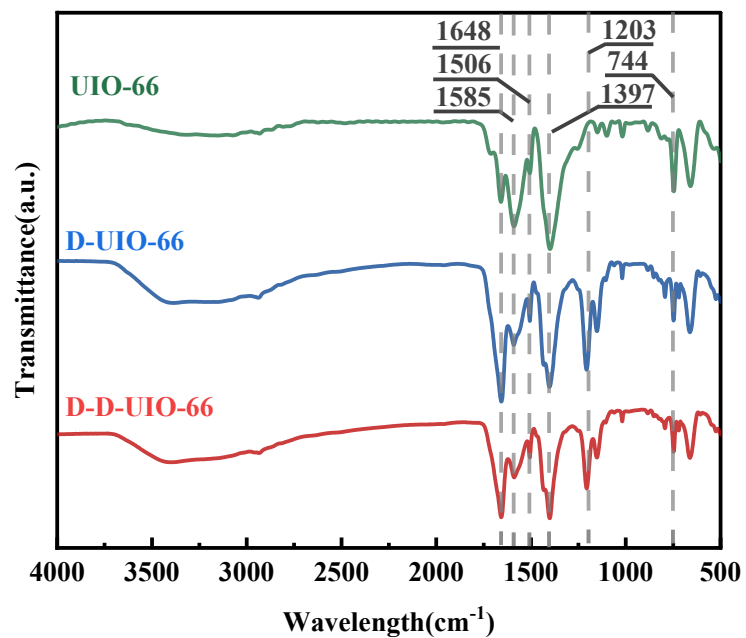

168

169

170

171

Figure S13 FT-IR spectra of UiO-66 ,D-UiO-66 and D-D-UIO-66.

172

173

Table S1 Compared with other materials Pb(II) detection performance

| Electrodes                                      | Method | Sensitivity<br>( $\mu\text{A } \mu\text{M}^{-1}$ ) | Detection limit<br>(nM) | References |
|-------------------------------------------------|--------|----------------------------------------------------|-------------------------|------------|
| Bi/Bi <sub>2</sub> O <sub>3</sub> @C            | DPASV  | 3.35                                               | 6.3                     | 1          |
| BCN-Nafion/GCE                                  | SWAS   | 0.509                                              | 0.9                     | 2          |
|                                                 | V      |                                                    |                         |            |
| Fe <sub>3</sub> O <sub>4</sub> @MPC-2/GCE       | DPASV  | 22.3                                               | 12.1                    | 3          |
| Fe@YAU-101/GCE                                  | DPASV  | 0.596                                              | 33.3                    | 4          |
| e-CuFe-PBA/GCE                                  | DPASV  | 24.915                                             | 28.7                    | 5          |
|                                                 | SWAS   |                                                    |                         |            |
| $\alpha$ -MoO                                   | SWAS   | 0.033                                              | 9.72                    | 6          |
|                                                 | V      |                                                    |                         |            |
| g-C <sub>3</sub> N <sub>4</sub> -P(Ani-Py)-PAAM | DPASV  | 1.2906                                             | 14.84                   | 7          |
| Cu-Co <sub>3</sub> O <sub>4</sub> MCNS          | DPASV  | 20.59                                              | 20.9                    | 8          |
| ALA/pDA/rGO                                     | DPASV  | 15.41                                              | 13.774                  | 9          |
| D-D-UIO-66 (This work)                          | DPASV  | 20.204                                             | 5.965                   |            |

174

175

Table S2 Comparison of individual and simultaneous detection

|                           | HMIs    | Sensitivity<br>( $\mu\text{A } \mu\text{M}^{-1}$ ) | R <sup>2</sup> |
|---------------------------|---------|----------------------------------------------------|----------------|
| Simultaneous<br>detection | Cd (II) | 10.092                                             | 0.959          |
|                           | Pb (II) | 15.209                                             | 0.996          |
|                           | Hg (II) | 1.347                                              | 0.916          |
|                           | Cu (II) | 2.829                                              | 0.980          |
| Individual<br>detection   | Cd (II) | 12.838                                             | 0.993          |
|                           | Pb (II) | 20.204                                             | 0.989          |
|                           | Hg (II) | 1.668                                              | 0.969          |

Cu (II)

2.387

0.983

176

177 Table S3. Langmuir and Freundlich adsorption parameters for Pb(II) on the four adsorbents at 298

178 K.

| Adsorbents | Langmuir isotherm parameters   |                                                     |                | Freundlich isotherm parameters                      |                |
|------------|--------------------------------|-----------------------------------------------------|----------------|-----------------------------------------------------|----------------|
|            | $Q_m$<br>(mg g <sup>-1</sup> ) | $K_L$ (*10 <sup>-3</sup> )<br>(L mg <sup>-1</sup> ) | R <sup>2</sup> | $K_F$<br>(mg <sup>1-(1/n)</sup> L <sup>1/n</sup> g) | R <sup>2</sup> |
| D-UIO-66   | 416.85                         | 0.0001                                              | 0.9864         | 0.301                                               | 0.9440         |
| D-D-UIO-66 | 667.04                         | 0.0156                                              | 0.9968         | 0.473                                               | 0.9848         |

179

180 Table S4. Estimates of parameter values for the adsorption of Pb(II) on adsorbents at 298 K

181 according to the pseudo-first-order and pseudo-second-order models.

| Adsorbents | pseudo-first-order             |                               |                | pseudo-second-order            |                                                                       |                |
|------------|--------------------------------|-------------------------------|----------------|--------------------------------|-----------------------------------------------------------------------|----------------|
|            | $Q_e$<br>(mg g <sup>-1</sup> ) | $K_1$<br>(min <sup>-1</sup> ) | R <sup>2</sup> | $Q_m$<br>(mg g <sup>-1</sup> ) | $K_2$ (*10 <sup>-4</sup> )<br>(g mg <sup>-1</sup> min <sup>-1</sup> ) | R <sup>2</sup> |
| D-UIO-66   | 349.94                         | 0.126                         | 0.982          | 364.823                        | 6.798                                                                 | 0.991          |
| D-D-UIO-66 | 385.92                         | 0.128                         | 0.969          | 402.40                         | 6.184                                                                 | 0.973          |

182

183 Table S5 Comparison of LOD and theoretical adsorption capacity for Pb(II) with other

184 bifunctional materials

| Absorbent | $Q_m$ (mg g <sup>-1</sup> ) | Detection limit<br>(nM) | References |
|-----------|-----------------------------|-------------------------|------------|
| BUC-77    | 425                         | 33.36                   | 10         |
| IIMB      | 124.07                      | 4.58                    | 11         |
| FSH-6     | 265.9                       | 0.289                   | 12         |

|            |        |       |           |
|------------|--------|-------|-----------|
| NBW        | 211.6  | 0.627 | 13        |
| CDs        | 183    | -     | 14        |
| D-D-UIO-66 | 667.04 | 5.965 | This work |

185

186 Table S6 Comparison of theoretical adsorption capacity for Pb(II) with other monofunctional

187

materials

| Absorbent                                    | $Q_m$ (mg g <sup>-1</sup> ) | References |
|----------------------------------------------|-----------------------------|------------|
| SALDETA@CPTMS@Fe <sub>3</sub> O <sub>4</sub> | 415.5                       | 15         |
| Fe-LAA                                       | 508.2                       | 16         |
| A/M-CDMOF                                    | 414.2                       | 17         |
| MOF-DFSA                                     | 349.09                      | 18         |
| D-D-UIO-66                                   | 667.04                      | This work  |

188

189

190 **References**

- 191 1 Wang, C.; Niu, Q.; Liu, D.; Dong, X.; You, T. Electrochemical Sensor Based on Bi/Bi<sub>2</sub>O<sub>3</sub> Doped  
192 Porous Carbon Composite Derived from Bi-MOFs for Pb<sup>2+</sup> Sensitive Detection. *Talanta* **2023**,  
193 **258**, 124281.
- 194 2 Huang, R.; Lv, J.; Chen, J.; Zhu, Y.; Zhu, J.; Wågberg, T.; Hu, G. Three-Dimensional Porous  
195 High Boron-Nitrogen-Doped Carbon for the Ultrasensitive Electrochemical Detection of Trace  
196 Heavy Metals in Food Samples. *J. Hazard. Mater.* **2023**, **442**, 130020.
- 197 3 Liu, Y.; Wu, S.; Xiong, W.; Li, H. Interface Co-Assembly Synthesis of Magnetic  
198 Fe<sub>3</sub>O<sub>4</sub>@Mesoporous Carbon for Efficient Electrochemical Detection of Hg<sup>2+</sup> and Pb<sup>2+</sup>. *Adv.*  
199 *Mater. Interfaces* **2023**, **105**, 2201631.
- 200 4 Liang, Q.; Xiao, W.; Zhang, C.; Zhu, D.; Wang, S.-L.; Tian, S.-Y.; Long, T.; Yue, E.-L.; Wang,  
201 J.-J.; Hou, X.-Y. MOFs-Based Fe@YAU-101/GCE Electrochemical Sensor Platform for  
202 Highly Selective Detecting Trace Multiplex Heavy Metal Ions. *Talanta* **2023**, **259**, 124491.
- 203 5 Jin, S.; Pang, J.; Ma, F.; Cheng, Y.; Shen, Y.; Xiao, Z.; Chen, L. Regulating Valence States of  
204 CuFe-PBA for the Simultaneous Electrochemical Detection of Cd<sup>2+</sup>, Pb<sup>2+</sup> and Hg<sup>2+</sup> in Food  
205 Application. *Talanta* **2024**, **273**, 125848.
- 206 6 Li, P.-H.; Song, Z.-Y.; Yang, M.; Chen, S.-H.; Xiao, X.-Y.; Duan, W.-C.; Li, L.-N.; Huang, X.-J.  
207 Electrons in Oxygen Vacancies and Oxygen Atoms Activated by Ce<sup>3+</sup>/Ce<sup>4+</sup> Promote High-  
208 Sensitive Electrochemical Detection of Pb<sup>2+</sup> Over Ce-Doped α-MoO<sub>3</sub> Catalysts. *Anal. Chem.*  
209 **2020**, **9224**, 16089-16096.
- 210 7 Xiao, L.; Zhao, Y.; Chang, G.; Yan, H.; Zou, R.; Zhang, X.; Wang, S.; He, H. A 3D Phytic Acid  
211 Cross-Linked High-Porous Conductive Hydrogel Integrating g-C<sub>3</sub>N<sub>4</sub> for Electrochemical

212 Multiplex Sensing of Heavy Metal Ions. *Anal. Chim. Acta* **2023**, **1269**, 341341.

213 8 Pang, J.; Sun, K.; Jin, S.; Hou, J.; Wang, G.; Sun, K.; Zheng, Y.; Zhang, Y.; Chen, L. Oxygen  
214 Vacancies Enriched Multi-Channel-Like Metal-Doped Co<sub>3</sub>O<sub>4</sub> Nanosheets by Lewis Acid  
215 Etching for Detection of Small Biological Molecules in Apple Juice and Wine. *Chem. Eng. J.*  
216 **2023**, **454**, 140085.

217 9 Patel, M.; Bisht, N.; Prabhakar, P.; Sen, R. K.; Kumar, P.; Dwivedi, N.; Ashiq, M.; Mondal, D.  
218 P.; Srivastava, A. K.; Dhand, C. Ternary Nanocomposite-Based Smart Sensor: Reduced  
219 Graphene Oxide/Polydopamine/Alanine Nanocomposite for Simultaneous Electrochemical  
220 Detection of Cd<sup>2+</sup>, Pb<sup>2+</sup>, Fe<sup>2+</sup>, and Cu<sup>2+</sup> Ions. *Environ. Res.* **2023**, **221**, 115317.

221 10 Song, X.; Fu, H.; Wang, P.; Li, H. Y.; Zhang, Y. Q.; Wang, C. C. The Selectively Fluorescent  
222 Sensing Detection and Adsorptive Removal of Pb<sup>2+</sup> with a Stable [δ-Mo<sub>8</sub>O<sub>26</sub>]-Based Hybrid. *J.*  
223 *Colloid Interface Sci.* **2018**, **532**, 598-604.

224 11 Wu, P.; He, Y.; Lu, S.; Wang, S.; Yi, J.; He, Y.; Zhang, J.; Xiang, S.; Ding, P.; Kai, T.; Pan, H.  
225 A Regenerable Ion-Imprinted Magnetic Biocomposite for Selective Adsorption and Detection  
226 of Pb<sup>2+</sup> in Aqueous Solution. *J. Hazard. Mater.* **2021**, **408**, 124410.

227 12 Zhang, Z.; Huang, Z.; Qin, D.; Liu, D.; Guo, X.; Lin, H. Fluorescent Starch-Based Hydrogel  
228 with Cellulose Nanofibrils and Carbon Dots for Simultaneous Adsorption and Detection of  
229 Pb<sup>2+</sup>. *Carbohydr. Polym.* **2024**, **323**, 121427.

230 13 Qi, X.; Chen, Y.; Liu, M.; Zhang, X.; Zuo, Y.; Ma, Q.; Xie, X.; Guo, X.; Wu, Y. Green and Cost-  
231 Effective: Bifunctional Wood for Efficient Adsorption and Sensitive Detection of Pb<sup>2+</sup>. *Ind.*  
232 *Crops Prod.* **2024**, **210**, 118162.

233 14 Jing, L.; Ding, Q.; Li, X.; Lou, J.; Liu, Z.; Jiang, Y.; Han, W.; Cheng, Z. Bifunctional Collagen



234 Fiber/Carbon Quantum Dot Fluorescent Adsorbent for Efficient Adsorption and Detection of  
235  $Pb^{2+}$ . *Sci. Total Environ.* **2023**, **871**, 161989.

236 15 Solanki, K.; Sharma, S.; Rana, P.; Kaushik, B.; Yadav, S.; Dixit, R.; Birdar, A. V.; Gupta, A.;  
237 Sharma, R. K. A Structurally Engineered Flower Shaped Magnetic Hierarchical Sorbent for  
238 Rapid and Selective Uptake of  $Pb^{2+}$  Ions from Water Samples. *Mater. Chem. Front.* **2023**, **7**  
239 (19), 4482-4496.

240 16 Chowdhury, S. S.; Roy, D.; De, S. Facile Green Synthesis of Novel Iron Aspartate (Fe-LAA)  
241 MOF for Adsorptive Mitigation of Lead (Pb) from Water. *J. Clean. Prod.* **2023**, **426**, 139146.

242 17 Jia, J.; Zhu, J.; Guo, L.; Yu, J.; Li, J.; Li, F. Synthesis and Characterization of a  $\beta$ -Cyclodextrin-  
243 MOF-Based Porous Hydrogel for Efficient Adsorption of  $Au^{3+}$ ,  $Ag^+$ , and  $Pb^{2+}$  Ions. *Sep. Purif.*  
244 *Technol.* **2024**, **348**, 127664.

245 18 Wang, H.; Wang, S.; Wang, S.; Fu, L.; Zhang, L. The One-Step Synthesis of a Novel Metal-  
246 Organic Framework for Efficient and Selective Removal of Cr (VI) and Pb (II) from  
247 Wastewater: Kinetics, Thermodynamics, and Adsorption Mechanisms. *J. Colloid Interface Sci.*  
248 **2023**, **640**, 230-245.

249
